# Supplementary material
Source: ML conference proceedings conference paper supplement (https://proceedings.neurips.cc/paper_files/paper/2013/hash/a49e9411d64ff53eccfdd09ad10a15b3-Abstract.html)
Supplement: Supplementary file [file a49e9411d64ff53eccfdd09ad10a15b3-Supplemental.zip]

# B-tests: Low Variance Kernel Two-Sample Tests– Supplementary Material

|                                                                                                                                                                                                       |                                                                                                                                                                                |                                                                                                                                                                 |
|-------------------------------------------------------------------------------------------------------------------------------------------------------------------------------------------------------|--------------------------------------------------------------------------------------------------------------------------------------------------------------------------------|-----------------------------------------------------------------------------------------------------------------------------------------------------------------|
| <p><b>Wojciech Zaremba</b><br/>         Center for Visual Computing<br/>         École Centrale Paris<br/>         Châtenay-Malabry, France<br/>         {woj.zaremba, arthur.gretton}@gmail.com,</p> | <p><b>Arthur Gretton</b><br/>         Gatsby Unit<br/>         University College London<br/>         United Kingdom<br/>         {woj.zaremba, arthur.gretton}@gmail.com,</p> | <p><b>Matthew Blaschko</b><br/>         Équipe GALEN<br/>         Inria Saclay<br/>         Châtenay-Malabry, France<br/>         matthew.blaschko@inria.fr</p> |
|-------------------------------------------------------------------------------------------------------------------------------------------------------------------------------------------------------|--------------------------------------------------------------------------------------------------------------------------------------------------------------------------------|-----------------------------------------------------------------------------------------------------------------------------------------------------------------|

## 1 Experiments

### 1.1 Detecting simple differences in three synthetic benchmarks

In this additional set of experiments, the data are as described in Sec. B.1 of [1]. Results are shown in Table 1 and Figure 1.

| Dataset                 | Method                         | Parameters     | Type I error | Type II error | Computational time (s) |
|-------------------------|--------------------------------|----------------|--------------|---------------|------------------------|
| difference of means     | $B$ -test                      | $B = 2$        | 0.056        | 0.384         | 0.0040                 |
|                         |                                | $B = \sqrt{n}$ | 0.037        | 0             | 0.1912                 |
|                         | Gram matrix spectrum Bootstrap | $B = 2000$     | 0.07         | 0             | 511.801                |
|                         |                                |                | 0.05         | 0             | 122.399                |
| difference of variances | $B$ -test                      | $B = 2$        | 0.056        | 0.337         | 0.0040                 |
|                         |                                | $B = \sqrt{n}$ | 0.037        | 0             | 0.2043                 |
|                         | Gram matrix spectrum Bootstrap | $B = 2000$     | 0.06         | 0             | 404.186                |
|                         |                                |                | 0.05         | 0             | 126.859                |
| frequency distortion    | $B$ -test                      | $B = 2$        | 0.058        | 0.4180        | 0.0038                 |
|                         |                                | $B = \sqrt{n}$ | 0.027        | 0             | 0.1809                 |
|                         | Gram matrix spectrum Bootstrap | $B = 2000$     | 0.05         | 0             | 403.391                |
|                         |                                |                | 0.06         | 0             | 122.429                |

Table 1: Synthetic benchmarks.

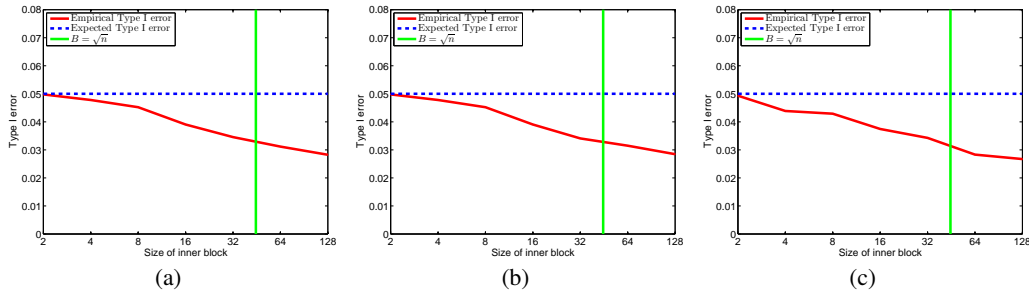

Figure 1: three synthetic benchmarks.

## References

- [1] A Gretton, B Sriperumbudur, D Sejdinovic, H Strathmann, S Balakrishnan, M Pontil, and K Fukumizu. Optimal kernel choice for large-scale two-sample tests. In *Advances in Neural Information Processing Systems 25*, pages 1214–1222, 2012.
